# Supplementary material for: Classical simulations from the atomistic to the mesoscale and back: coarse graining an azobenzene liquid crystal
Source: Royal Society of Chemistry journal article supplement (doi:10.1039/b717324e), 2008-01-01
Supplement: b717324e.pdf [file b717324e.pdf]

**Supplementary material for "Peter et al.: Classical simulations from the atomistic to the mesoscale and back: coarse graining an azobenzene liquid crystal"**

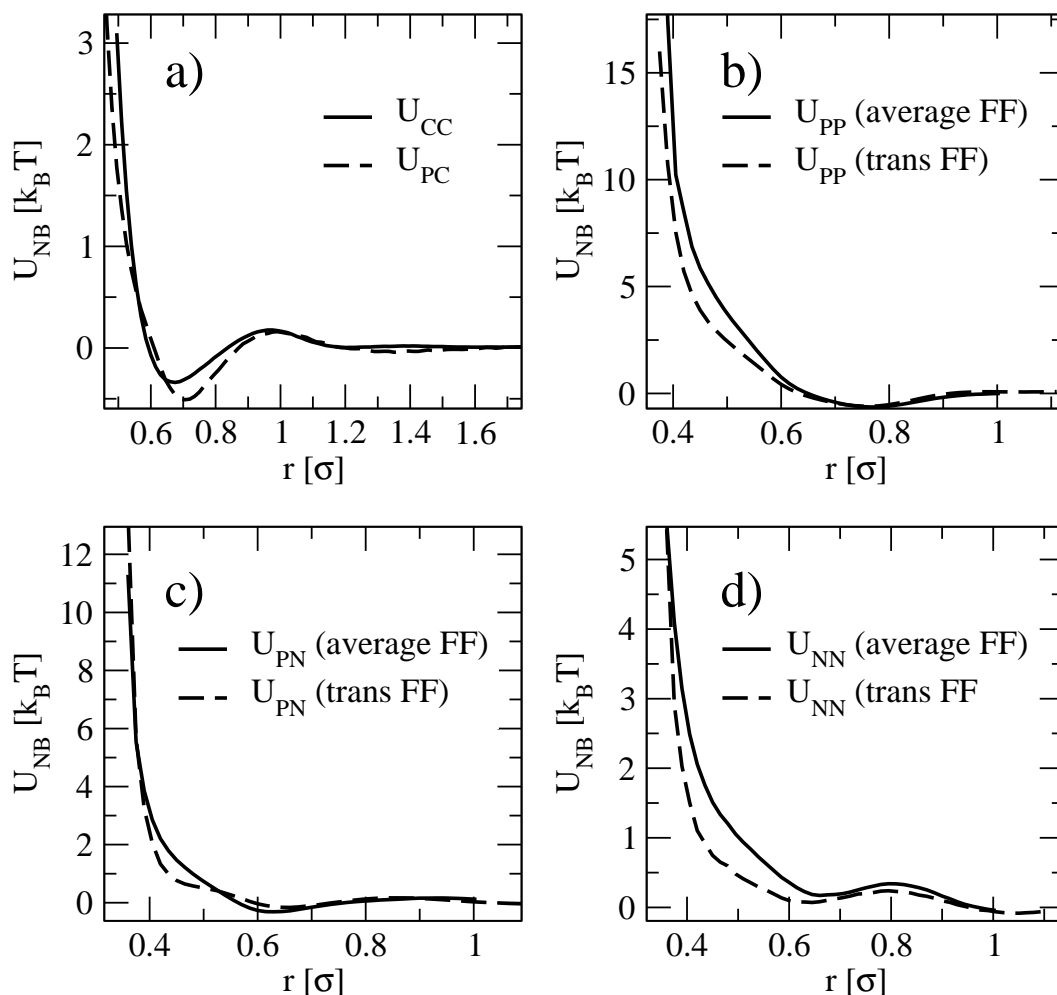

Suppl. Mat. Fig. 1: Tabulated potentials for nonbonded interactions between CG beads determined by iterative Boltzmann inversion (at 400 K). Bead types labeled according to Fig. 1 in paper. Panel a: solid line – C-C interaction parametrized on octadecane melt; dashed line – P-C interactions parametrized on benzene in octadecane mixture. Panels b, c, and d: P-P, P-N and N-N interactions parametrized on azobenzene; solid lines – average-8AB8 FF (see text); dashed lines *trans*-8AB8 FF. Reduced unit length conversion:  $1 \sigma = 8 \text{ \AA}$ .

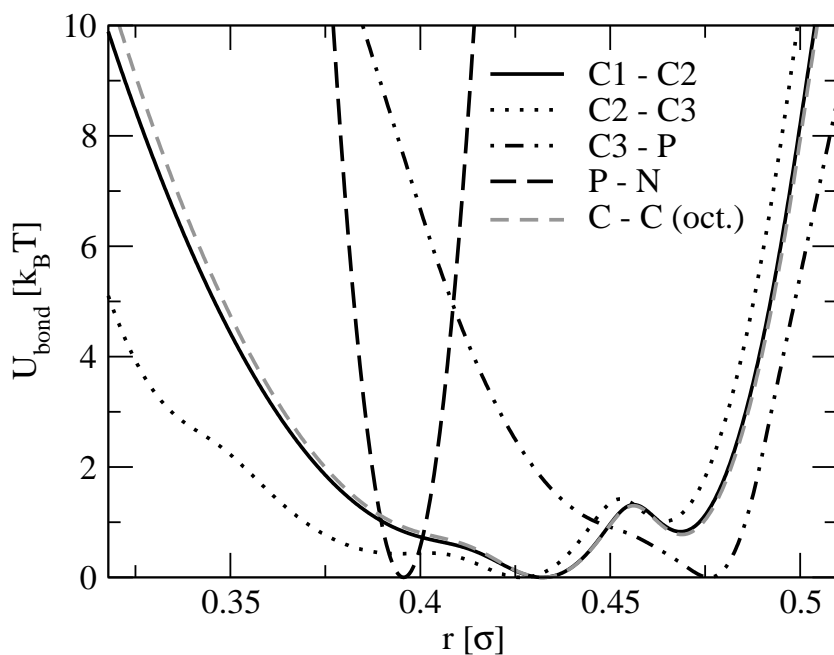

Suppl. Mat. Fig. 2: Bond potentials between CG beads in *trans* 8AB8 (black lines) and octadecane (gray dashed line). Bead types are labeled according to Fig. 1 in paper, for 8AB8 C1, C2, and C3 refer to the consecutive beads in the alkoxy tail with C3 being the alkoxy bead adjacent to the P bead. Reduced unit conversion:  $1 \sigma = 8 \text{ \AA}$ ,  $T = 1.0$  corresponds to 400 K.

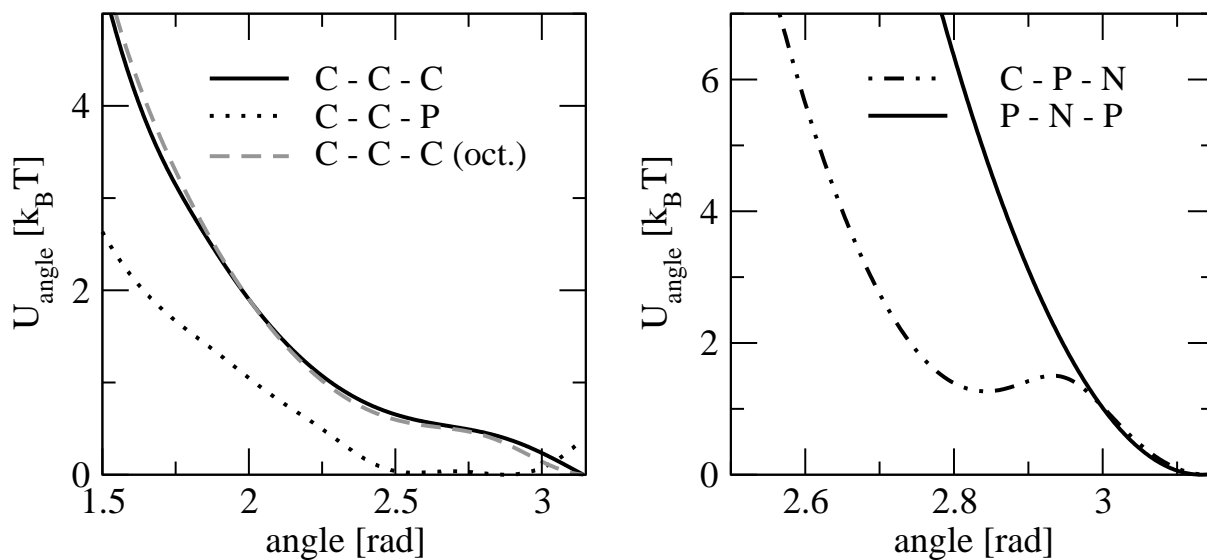

Suppl. Mat. Fig. 3: Angle potentials between CG beads in *trans* 8AB8 (black lines) and octadecane (gray dashed line). Bead types are labeled according to Fig. 1 in paper. Reduced unit conversion:  $T = 1.0$  corresponds to 400 K.

| interaction    | $K$ [ $k_B T$ ] | $n$ | $p$ |
|----------------|-----------------|-----|-----|
| C-C-C-P (8AB8) | 0.4             | 1   | -1  |
| C-C-P-N (8AB8) | 0.6             | 1   | -1  |
| C-P-N-P (8AB8) | 0.1             | 1   | -1  |
| C-C-C-C (oct.) | 0.35            | 1   | -1  |

Suppl. Mat. Tab. I: Force constant for dihedral potentials between CG beads in *trans* 8AB8 and octadecane (C-C-C-C). Functional form of the (cosine) potential:  $U^{CG}(\phi) = K(1 + p \cos(n\phi))$ . Bead types are labeled according to Fig. 1 in paper. Reduced unit conversion:  $T = 1.0$  corresponds to 400 K.

| interaction | $\epsilon$ [ $k_B T$ ] | $\sigma_M$ | $\alpha$ |
|-------------|------------------------|------------|----------|
| N - N       | 0.226                  | 0.618      | 5.686    |
| P - P       | 0.2                    | 1.122      | 3.0      |
| N - P       | 0.137                  | 0.721      | 6.468    |
| C - C       | 0.207                  | 0.704      | 8.563    |
| P - C       | 0.096                  | 0.92       | 4.658    |
| N - C       | 0.226                  | 0.618      | 5.686    |

Suppl. Mat. Tab. II: Parameters for repulsive morse potentials (Equation 6 in paper) used in repulsive-Morse 8AB8 FF. Bead types are labeled according to Fig. 1 in paper. Reduced unit conversion:  $1 \sigma = 8 \text{ \AA}$ ,  $T = 1.0$  corresponds to 400 K.
